# Supplementary material
Source: PubMed Central journal article supplement (PMC6470054)
Supplement: NIHMS1017197-supplement-Appendix_References.pdf [file NIHMS1017197-supplement-Appendix_References.pdf]

## References

- [76] K. Kim, K. S. Kim, H. Park, J. C. Ye, Y. Park, *Optics Express* 2013, 21, 32269.
- [77] O. Zhernovaya, O. Sydoruk, V. Tuchin, A. Douplik, *Physics in Medicine & Biology* 2011, 56, 4013.
- [78] S. A. Prahl, <http://omlc.ogi.edu/spectra/hemoglobin/summary.html> 1999.
