# Supplementary material
Source: PubMed Central journal article supplement (PMC6470054)
Supplement: NIHMS1017197-supplement-Supplemental_Author_Bio.pdf [file NIHMS1017197-supplement-Supplemental_Author_Bio.pdf]

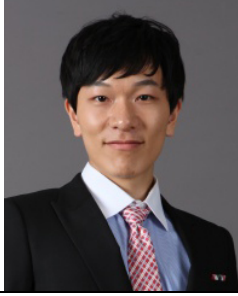

**Dr. KyeoReh Lee** is a postdoctoral researcher in KAIST. He earned a Ph.D at KAIST in 2018. His research interests comprise overall light-related techniques with a focus on the techniques related to holography, multiple scattering, and disordered system.

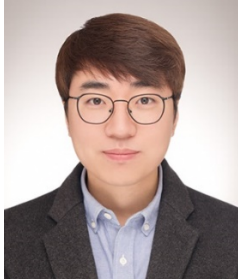

**Seungwoo Shin** received his bachelor degree in physics from KAIST in 2014. He is currently a senior graduate student pursuing his Ph.D. under the advisement of Prof. YongKeun Park in physics department at KAIST. His research interests include digital holography and optical diffraction tomography. His thesis projects involve developing methods for reconstruction of anisotropic refractive index distributions, in order to realize label-free molecular specific imaging for applications in biology and medicine.

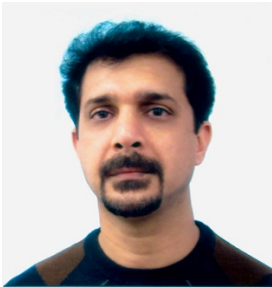

**Dr. Zahid Yaqoob** is a Research Scientist at the Laser Biomedical Research Center, MIT. He received his Ph.D. from The College of Optics & Photonics / CREOL, University of Central Florida and postdoctoral training in Biomedical Optics at the Biophotonics Lab at Caltech. His research interests include developing optical microscopy and spectroscopy systems for biomedical applications.

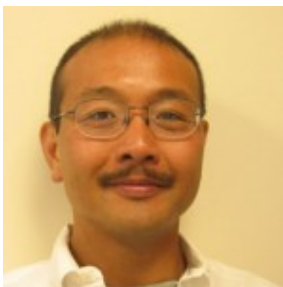

**Prof. Peter T. C. So** is a professor in the Department of Mechanical and Biological Engineering in the Massachusetts Institute of Technology. Prior to joining MIT, Peter So obtained his Ph.D. from Princeton University in 1992 and subsequently worked as a postdoctoral associate in the Laboratory for Fluorescence Dynamics in the University of Illinois in Urban-Champaign. His research focuses on developing high resolution and high information content microscopic imaging instruments. These instruments are applied in biomedical studies such as the non-invasive optical biopsy of cancer, the mechanotransduction processes in cardiovascular diseases, and the effects of neuronal remodeling on memory plasticity. Peter So is currently the Director of the MIT Laser Biomedical Research Center, a NIH NIBIB P41 research resource.

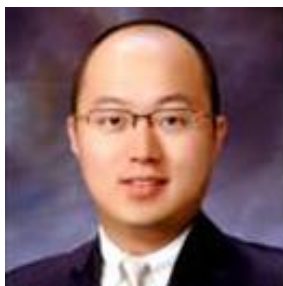

**Prof. YongKeun (Paul) Park** is an associate professor of physics at KAIST. Dr. Park's area of research is wave optics, and its applications for biology and medicine. He has published +120 peer-reviewed papers including 3 Nat Photon, 2 Nat Comm, 4 PRL, 4 PNAS papers. Also, he is a fellow in OSA, and an editor of Optics Express, Scientific Reports, and Journal of Current Optics and Photonics. Two start-up companies with +50 employees have been created from his research (Tomocube, The.Wave.Talk). Dr. Park is currently the Director of Creative Research Center.
